# Supplementary material
Source: publisher figshare collection journal article supplement (https://gsapubs.figshare.com/articles/dataset/_/23721282)
Supplement: Supplementary file 1 [file 1]

## Sheet: Table S1
Table S1. The sample locality of the Tuoyun monchiquite Ⅰ, Ⅱ and camptonite studied in the present study
Rock Type	Sample ID	Longitude	Latitude
Monchiquite Ⅰ	TY-02-01	75.3453°	40.1592°
	TY-02-02	75.3453°	40.1592°
	TY-02-04	75.3453°	40.1592°
	TY-04-02	75.3457°	40.1593°
	TY-04-03	75.3457°	40.1593°
	TY-04-13	75.3457°	40.1593°
	TY-07-02	75.3436°	40.1620°
	TY-07-03	75.3436°	40.1620°
	TY-07-08	75.3436°	40.1620°
	TY-J-1	75.3457°	40.1593°
	TY-J-1'	75.3457°	40.1593°
	TY-J-1''	75.3457°	40.1593°
	W-G-1-1	75.3420°	40.1592°
	W-G-4-1	75.3420°	40.1592°
	W-G-4-2	75.3420°	40.1592°
	W-G-4-3	75.3420°	40.1592°
	W-G-4-5	75.3420°	40.1592°
	WB5-1	75.3420°	40.1592°
	WB5-2	75.3420°	40.1592°
	WB5-3	75.3420°	40.1592°
	WB31.1	75.3420°	40.1592°
	WB12.2	75.3420°	40.1592°
	W4-3	75.3420°	40.1592°
	W6-1	75.3420°	40.1592°
	B-1-5	75.3420°	40.1592°
	B-3-7	75.3420°	40.1592°
	L-3-1	75.3420°	40.1592°
	L-6-1	75.3420°	40.1592°
	L-7-2	75.3420°	40.1592°
	L-7-3	75.3420°	40.1592°
Monchiquite Ⅱ	TY-03-04	75.3453°	40.1592°
	TY-04-05	75.3457°	40.1593°
	TY-04-06	75.3457°	40.1593°
	TY-04-09	75.3457°	40.1593°
	TY-04-11	75.3457°	40.1593°
	TY-04-13	75.3457°	40.1593°
	TY-04-19	75.3457°	40.1593°
	TY-04-22	75.3457°	40.1593°
Camptonite	TY-04-01	75.3457°	40.1593°
	TY-05-02	75.3437°	40.1604°
	TY-05-03	75.3437°	40.1604°
	TY-05-04	75.3437°	40.1604°
	TY-05-05	75.3437°	40.1604°
	L-1-2	75.3420°	40.1592°
	L-1-3	75.3420°	40.1592°
	L-2-1	75.3420°	40.1592°
	L-3	75.3420°	40.1592°
	B-1-1	75.3420°	40.1592°
	B-3-3	75.3420°	40.1592°
	B-3-4	75.3420°	40.1592°
	B-3-6	75.3420°	40.1592°
	B-4-1	75.3420°	40.1592°
	B-4-2	75.3420°	40.1592°
	B-5-1	75.3420°	40.1592°
	B-5-5	75.3420°	40.1592°

## Sheet: Table S2
Table S2. The results of standards used during the analysis of olivine, clinopyroxene and amphibole by EMPA
Standards	Olivine	Clinopyroxene	Amphibole
K2O	0	0	1.024
CaO	0	24.558	11.49
TiO2	0	0	5.098
P2O5	0	0.012	0.016
Na2O	0	0.353	2.296
MgO	50.62	17.885	12.704
Al2O3	0	0.604	11.96
SiO2	41.289	55.679	41.214
Cr2O3	0.012	0.001	0.018
MnO	0.132	0.064	0.159
FeO	7.033	0.751	11.387
NiO	0.287	0.038	0.013
F	0	0	0.165
Cl	0	0	0.03
Total	99.373	99.945	97.498

## Sheet: Table S3
Table S3. Olivine major elemental compositions (wt.%) analyzed by EMPA in the Tuoyun monchiquite Ⅰ
Data	TY-02-01 Q2 OL	TY-02-01 Q6 OL	TY-04-02 Q3 OL1	TY-04-02 Q3 SP1	TY-07-8-Q4-OL	TY-07-2-Q2-OL	TY-07-2-Q3-OL	W-G-4-1	W-G-4-5	W-G-1-1	W-G-4-2	W-G-4-2-2	W-G-4-3	TY-02-01 Q3 OL2	TY-02-01 Q3 OL4	TY-04-02 Q2 OL1	TY-04-02 Q2 OL2	TY-04-02 Q2 OL3	TY-07-8-Q2-OL	TY-07-8-Q5-OL	TY-07-8-Q7-OL	TY-07-8-Q7-OL
Mineral	Phenocrysts									Manlte xenocrysts
SiO2	41.126	40.989	40.999	37.199	41.727	39.66	40.383	40.198	40.025	40.549	40.788	40.64	40.591	40.289	40.283	41.945	41.765	41.172	41.662	41.392	42.071	40.898
TiO2	0	0	0.083	0.152	0.087	0.043	0.05	0.014	0	0.018	0	0	0.008	0.057	0.073	0	0.041	0	0.015	0	0.035	0.015
Al2O3	0.093	0.028	0.016	0.2	0.047	0.053	0.052	0.047	0.041	0.009	0.023	0.001	0.006	0.022	0.024	0.027	0.032	0	0.022	0	0.035	0.009
Cr2O3	0	0.049	0.061	0.918	0.046	0	0.013	0.03	0.033	0.013	0.005	0.023	0.02	0.021	0.033	0.141	0.038	0.115	0.033	0.013	0.012	0.015
FeO	11.61	12.204	13.311	13.918	12.086	19.057	14.465	12.304	12.918	9.393	9.798	9.702	11.011	12.611	12.316	9.774	9.577	9.466	9.242	9.747	9.145	9.75
MnO	0.123	0.134	0.188	0.278	0.116	0.221	0.109	0.193	0.187	0.122	0.151	0.166	0.166	0.185	0.228	0.159	0.113	0.169	0.191	0.117	0.105	0.157
MgO	47.321	46.638	45.112	45.705	46.008	40.166	43.985	46.583	46.61	49.731	48.945	49.468	48.438	45.323	45.703	47.778	48.306	48.211	48.604	47.277	48.899	47.415
NiO	0.152	0.211	0.061	0.25	0.242	0.087	0.224	0.169	0.183	0.337	0.233	0.239	0.297	0.287	0.34	0.304	0.364	0.421	0.446	0.345	0.415	0.39
CaO	0.211	0.217	0.223	0.264	0.215	0.169	0.273	0.237	0.232	0.052	0.066	0.065	0.075	0.067	0.08	0.058	0.06	0.053	0.06	0.049	0.049	0.078
Na2O	0.06	0.055	0.01	0.045	0.049	0	0.052	0.025	0	0.009	0.015	0.017	0.001	0.034	0.06	0.045	0.005	0.014	0.064	0.049	0.029	0.044
K2O	0.012	0.004	0	0	0.023	0.003	0	0	0	0	0	0	0	0.012	0.004	0.023	0	0.012	0.028	0.002	0.01	0.014
P2O5	0.055	0.058	0.012	0	0.103	0.007	0.121	0.033	0.012	0.021	0.046	0	0.009	0	0.134	0.016	0.005	0	0.045	0.014	0	0.042
Total	100.776	100.586	100.102	98.993	100.75	99.547	99.742	99.833	100.241	100.254	100.07	100.321	100.622	98.951	99.372	100.4	100.357	99.645	100.465	99.03	100.891	98.839
Number of ions (apfu) calculated on the basis of 4O atoms
Si	1.00847	1.00999	1.01827	0.950388	1.02435	1.01867	1.01476	0.999806	0.994387	0.991545	0.999901	0.993823	0.995449	1.01165	1.0087	1.02339	1.01761	1.01156	1.01494	1.02292	1.01811	1.01471
Ti	0	0	0.00155084	0.00292155	0.00160676	0.000830903	0.000945227	0.000261963	0	0.000331135	0	0	0.000147598	0.00107676	0.00137519	0	0.000751545	0	0.00027491	0	0.000637205	0.000279982
Al	0.00268772	0.000813139	0.000468343	0.0060222	0.00135983	0.0016044	0.00154002	0.00137773	0.0012005	0.000259376	0.00066452	2.88211e-05	0.000173419	0.000651065	0.000708284	0.000776387	0.000918918	0	0.000631651	0	0.00099824	0.00026317
Cr	0	0.000954601	0.00119782	0.0185433	0.00089282	0	0.000258276	0.000589939	0.000648206	0.000251334	9.69102e-05	0.00044469	0.000387788	0.000416908	0.000653325	0.0027199	0.000732031	0.00223388	0.000635605	0.000254005	0.000229598	0.000294242
Fe2+	0.238092	0.25149	0.276482	0.297382	0.248131	0.409359	0.303985	0.255933	0.268403	0.19209	0.200877	0.19842	0.225831	0.264828	0.257916	0.199434	0.19515	0.194501	0.188292	0.201448	0.185081	0.202307
Mn	0.00255467	0.00279667	0.00395486	0.00601588	0.00241198	0.00480794	0.00231994	0.00406587	0.00393506	0.00252684	0.00313535	0.00343834	0.00344812	0.00393462	0.00483572	0.0032858	0.00233203	0.0035169	0.0039411	0.00244903	0.00215221	0.00329931
Mg	1.72985	1.71317	1.67028	1.74077	1.68373	1.53797	1.6477	1.72722	1.72628	1.81288	1.78872	1.80338	1.77086	1.69657	1.70606	1.73778	1.75461	1.7658	1.76514	1.74174	1.76409	1.75373
Ni	0.00299761	0.00418137	0.00121844	0.00513683	0.00477785	0.00179716	0.00452689	0.00338052	0.00365646	0.00662747	0.00459374	0.00470044	0.00585776	0.0057958	0.00684708	0.00596511	0.00713277	0.00831871	0.00873814	0.00685691	0.00807691	0.00778195
Ca	0.00554371	0.00572907	0.00593425	0.00722681	0.00565513	0.00465095	0.00735024	0.00631586	0.00617569	0.00136241	0.00173357	0.00170311	0.00197071	0.00180258	0.00214637	0.00151621	0.00156637	0.0013952	0.00156611	0.00129746	0.00127052	0.00207351
Total	2.99019	2.98912	2.97935	3.03441	2.97292	2.9797	2.98339	2.99895	3.00469	3.00787	2.99972	3.00594	3.00412	2.98673	2.98924	2.97487	2.98081	2.98733	2.98416	2.97696	2.98064	2.98473
Fo	87.79	87.08	85.62	85.16	87.05	78.78	84.32	86.92	86.37	90.31	89.76	89.93	88.54	86.32	86.65	89.55	89.88	89.92	90.18	89.52	90.4	89.51
Fa	12.08	12.78	14.17	14.55	12.83	20.97	15.56	12.88	13.43	9.57	10.08	9.9	11.29	13.47	13.1	10.28	10	9.9	9.62	10.35	9.48	10.33
Tp	0.13	0.14	0.2	0.29	0.12	0.25	0.12	0.2	0.2	0.13	0.16	0.17	0.17	0.2	0.25	0.17	0.12	0.18	0.2	0.13	0.11	0.17
Mg#-melt	57.1028	57.1028	59.3803	59.3803				57.4546	57.4546

## Sheet: Table S4
Table S4. Clinopyroxene major elemental compositions (wt.%) analyzed by EMPA in the Tuoyun monchiquite Ⅰ, Ⅱ and camptonite
Data	TY-04-02 Q1 CPX4 OUT	TY-02-01 Q1 CPX1	TY-02-01 Q1 CPX2	TY-02-01 Q4 CPX OUT	ty-04-05 q3-cpx	ty-04-05 q9-cpx	ty-04-05 q5-cpx	TY-04-13-1	ty-04-05 q4-cpx	ty-04-05 q4-cpx2	ty-04-05 q4-cpx	ty-04-05 q7-cpx	ty-04-05 q8-cpx	TY-05-03-Q1-CPX2	TY-05-03-Q3-CPX-CORE	TY-05-03-Q4-CPX	TY-05-03-Q1-CPX	TY-05-03-Q2-CPX	TY-05-03-Q3-CPX-RIM	TY-05-02-Q3-CPX	TY-05-02-Q4-CPX	TY-05-02-Q6-CPX	TY-05-04-Q3-1	TY-05-04-Q3-2	TY-05-04-Q3-3	TY-05-04-Q3-4	TY-05-04-Q3-5	TY-04-03-Q7-C1	TY-04-03-Q1-C1	TY-02-01-Q1-C	TY-04-03-Q7-R1	TY-04-03-Q1-R1	TY-02-01-Q1-R	TY-02-01-Q4-C1	TY-02-01-Q4-C2	TY-02-01-Q4-C3	TY-02-01-Q4-C4	TY-02-01-Q4-C5	TY-02-01-Q5-C1	TY-02-01-Q5-C2	TY-02-01-Q10-C1	TY-02-01-Q10-C2	TY-02-01-Q10-C3	TY-02-01-Q4-R1	TY-02-01-Q4-R2	TY-02-01-Q5-R1	TY-02-01-Q5-R2	TY-02-01-Q10-R1	TY-02-01-Q10-R2
Comment	Phenocrysts in monchiquite Ⅰ	Phenocrysts in monchiquite Ⅰ	Phenocrysts in monchiquite Ⅰ	Phenocrysts in monchiquite Ⅰ	Phenocrysts in monchiquite Ⅱ	Phenocrysts in monchiquite Ⅱ	Phenocrysts in monchiquite Ⅱ	Phenocrysts in monchiquite Ⅱ	Phenocrysts in monchiquite Ⅱ	Phenocrysts in monchiquite Ⅱ	Phenocrysts in monchiquite Ⅱ	Phenocrysts in monchiquite Ⅱ	Phenocrysts in monchiquite Ⅱ	Phenocrysts in camptonite	Phenocrysts in camptonite	Phenocrysts in camptonite	Phenocrysts in camptonite	Phenocrysts in camptonite	Phenocrysts in camptonite	Phenocrysts in camptonite	Phenocrysts in camptonite	Phenocrysts in camptonite	Glomerocrysts in camptonite	Glomerocrysts in camptonite	Glomerocrysts in camptonite	Glomerocrysts in camptonite	Glomerocrysts in camptonite	Cores of Type-1 zoned grains in monchiquite Ⅰ	Cores of Type-1 zoned grains in monchiquite Ⅰ	Cores of Type-1 zoned grains in monchiquite Ⅰ	Rims of Type-1 zoned grains in monchiquite Ⅰ	Rims of Type-1 zoned grains in monchiquite Ⅰ	Rims of Type-1 zoned grains in monchiquite Ⅰ	Cores of Type-2 zoned grains in monchiquite Ⅰ	Cores of Type-2 zoned grains in monchiquite Ⅰ	Cores of Type-2 zoned grains in monchiquite Ⅰ	Cores of Type-2 zoned grains in monchiquite Ⅰ	Cores of Type-2 zoned grains in monchiquite Ⅰ	Cores of Type-2 zoned grains in monchiquite Ⅰ	Cores of Type-2 zoned grains in monchiquite Ⅰ	Cores of Type-2 zoned grains in monchiquite Ⅰ	Cores of Type-2 zoned grains in monchiquite Ⅰ	Cores of Type-2 zoned grains in monchiquite Ⅰ	Rims of Type-2 zoned grains in monchiquite Ⅰ	Rims of Type-2 zoned grains in monchiquite Ⅰ	Rims of Type-2 zoned grains in monchiquite Ⅰ	Rims of Type-2 zoned grains in monchiquite Ⅰ	Rims of Type-2 zoned grains in monchiquite Ⅰ	Rims of Type-2 zoned grains in monchiquite Ⅰ
SiO2	43.51	48.084	45.877	50.277	48.53	50.253	43.765	50.684	49.277	45.111	49.741	47.658	48.421	48.686	46.789	51.808	48.441	43.972	51.577	50.578	47.095	47.561	45.192	47.535	44.368	48.471	44.335	52.918	52.019	54.253	48.45	48.486	50.443	49.588	49.529	48.722	50.915	50.542	50.396	52.136	48.502	48.713	49.5	47.183	46.799	48.728	47.349	47	49.443
TiO2	4.682	1.446	3.687	1.769	2.2	2.1	4.814	1.795	2.113	4.304	1.832	2.614	2.539	1.914	2.684	0.761	2.344	4.276	1.382	1.509	2.421	2.52	3.365	2.565	3.284	2.024	3.174	0.296	0.333	0.352	1.918	2.149	1.341	0.228	0.337	0.41	0.223	0.382	0.538	0.336	1.478	1.28	1.109	3.012	3.247	2.785	3.161	2.632	2.106
Al2O3	9.771	6.691	8.161	6.787	4.556	4.057	9.008	3.368	3.91	7.036	3.726	5.966	5.883	7.9	8.827	3.795	7.977	10.844	4.501	5.366	8.387	8.877	11.279	9.231	11.357	7.469	11.481	5.714	7.398	4.948	7.728	7.561	6.656	7.82	6.101	7.911	4.536	5.402	6.042	4.399	6.721	6.545	5.469	7.599	8.497	6.926	8.209	7.091	5.296
FeO	7.431	9.642	7.079	6.184	7.859	7.668	8.718	6.735	7.273	8.565	7.308	7.268	7.643	8.906	9.12	12.281	7.415	7.523	7.706	7.602	7.964	8.528	11.111	10.576	10.584	11.125	11.008	3.916	4.025	2.937	6.994	6.677	6.39	10.444	9.644	10.095	9.219	9.166	9.196	9.427	10.491	9.914	10.338	7.633	7.748	7.19	7.883	7.597	7.409
MnO	0.163	0.267	0.051	0.051	0.207	0.248	0.205	0.209	0.285	0.199	0.194	0.12	0.217	0.227	0.203	0.432	0.216	0.118	0.187	0.166	0.137	0.158	0.051	0.19	0.165	0.224	0.201	0.168	0.099	0.116	0.203	0.175	0.155	0.387	0.297	0.324	0.213	0.252	0.297	0.274	0.245	0.264	0.232	0.164	0.161	0.2	0.156	0.182	0.205
MgO	10.756	11.486	11.651	14.353	12.435	13.252	10.455	13.169	13.363	11.526	13.574	12.448	12.233	12.382	10.349	10.704	12.742	11.616	15.13	15.077	12.276	12.056	9.086	9.917	9.032	10.941	8.94	15.832	14.561	16.264	13.22	13.082	14.61	10.54	11.49	10.974	12.166	12.509	12.512	13.714	11.405	11.681	11.784	12.132	11.621	12.235	11.992	11.99	12.61
CaO	21.805	21.164	21.998	19.714	22.464	22.407	22.08	22.163	22.263	22.91	22.16	22.036	22.501	18.9	19.922	19.228	19.313	19.781	18.679	18.554	19.892	19.315	18.594	19	18.664	18.654	18.814	20	18.833	18.465	19.274	20.066	18.654	21.034	20.803	21.067	21.111	21.259	20.379	19.569	20.744	20.958	20.937	21.054	21.369	21.083	21.167	21.891	21.241
Na2O	0.532	0.551	0.587	0.846	0.484	0.501	0.677	0.438	0.492	0.706	0.428	0.759	0.597	0.963	1.086	0.894	1.039	0.789	0.639	0.626	0.809	0.893	1.251	1.061	1.272	1.021	1.32	0.818	1.469	1.576	0.772	0.794	0.892	0.576	0.521	0.559	0.451	0.431	0.554	0.587	0.537	0.554	0.6	0.497	0.589	0.554	0.616	0.648	0.555
K2O	0.022	0.008	0.023	0.006		0.001	0.059	0.018	0.018	0.021	0.006	0.018	0.017	0.011	0.016	0.027	0.017	0.029	0.028			0.025	0.012	0.009	0.007	0.005	0.011	0.003	0.025	0.007	0.02	0.005	0.011	0	0.02	0.002	0.007	0.022	0.008	0.011	0.009	0.005	0.006	0	0	0.012	0.005	0.022	0.015
Cr2O3		0.003	0.005	0.148		0.066	0.011		0.043	0.012		0.117		0.163		0.002	0.058		0.293	0.291	0.19	0.095	0.019	0	0	0.064	0	0.57	0.756	0.901	0.352	0.352	0.395	0	0.068	0	0.022	0.001	0.064	0.037	0.051	0.059	0.006	0	0.015	0	0.14	0	0.01
Total	98.779	99.456	99.247	100.307	98.776	100.691	99.845	98.675	99.093	100.426	99.148	99.18	100.119	100.131	99.066	99.988	99.572	98.977	100.179	99.953	99.309	100.131	100.127	100.311	98.869	99.997	99.414	100.291	99.552	99.862	99.115	99.372	99.697	100.662	98.821	100.127	98.945	100.075	100.071	100.516	100.182	100.025	100.241	99.324	100.149	99.883	100.712	99.107	98.933
Number of ions (apfu) calculated on the basis of 6O atoms
Si	1.65091	1.81026	1.72475	1.8415	1.83337	1.85891	1.64968	1.91143	1.8485	1.68425	1.86384	1.78747	1.80306	1.80622	1.76683	1.95839	1.79798	1.65211	1.89893	1.86489	1.76023	1.7664	1.6989	1.78154	1.68617	1.8184	1.67635	1.91725	1.89456	1.95955	1.80575	1.80265	1.85616	1.84622	1.87245	1.81909	1.92066	1.88158	1.87434	1.92556	1.81593	1.82209	1.85057	1.77092	1.74417	1.81798	1.75332	1.76529	1.85996
Al	0.349092	0.18974	0.275251	0.158497	0.166633	0.141086	0.350317	0.0885688	0.151495	0.309599	0.136155	0.212528	0.196939	0.193783	0.233167	0.0416093	0.202023	0.347887	0.10107	0.135113	0.239772	0.2336	0.301105	0.218461	0.313826	0.181597	0.32365	0.0827546	0.105435	0.0404464	0.194249	0.197353	0.14384	0.153783	0.12755	0.180915	0.0793405	0.118423	0.125658	0.0744439	0.184074	0.177908	0.149434	0.229078	0.255832	0.182015	0.24668	0.234707	0.140045
Total	2	2	2	2	2	2	2	2	2	1.99384	2	2	2	2	2	2	2	2	2	2	2	2	2	2	2	2	2	2	2	2	2	2	2	2	2	2	2	2	2	2	2	2	2	2	2	2	2	2	2
Al	0.0878507	0.107142	0.0863473	0.134479	0.0362169	0.0357839	0.0498615	0.0611276	0.0213686	-0.00615509	0.0283915	0.0511886	0.0612432	0.151635	0.159673	0.12746	0.146926	0.132293	0.0942348	0.0980676	0.129675	0.154958	0.198615	0.189277	0.194857	0.148637	0.187972	0.161232	0.212115	0.170181	0.145206	0.133949	0.144815	0.189351	0.144284	0.167191	0.122324	0.118592	0.139183	0.117036	0.112494	0.11062	0.0915333	0.107063	0.117391	0.122525	0.111574	0.079183	0.0947548
Ti	0.133647	0.0409547	0.10428	0.0487446	0.0625255	0.0584402	0.136513	0.0509269	0.0596308	0.12089	0.0516435	0.0737571	0.071127	0.0534199	0.0762481	0.0216412	0.0654521	0.120864	0.0382786	0.0418577	0.0680744	0.0704099	0.0951667	0.072321	0.0938925	0.0571234	0.0902859	0.00806791	0.00912403	0.0095647	0.0537784	0.0601071	0.0371226	0.0063861	0.00958464	0.0115161	0.00632856	0.0106986	0.0150532	0.00933583	0.0416302	0.0360189	0.0311908	0.085048	0.0910394	0.0781685	0.0880582	0.0743704	0.0596007
Fe3+	0.0269208	0.0412026	0.017879	0	0.0368819	0.0211548	0.0782662	0	0.0409946	0.128562	0.0276735	0.0597425	0.0355542	0	0.000127614	0	0	0.0299644	0	0	0.0237307	0.000520086	0.00334731	0	0.0252499	0	0.0524041	0	0	0	0	0	0	0	0.00121754	0.0312522	0	0.0105574	0	0	0.0262203	0.0339207	0.0391185	0	0	0	0	0.055026	0
Mg	0.608398	0.644633	0.652977	0.783699	0.700307	0.730773	0.587491	0.740362	0.747281	0.641512	0.75824	0.695995	0.679068	0.684794	0.582577	0.603187	0.705037	0.650614	0.830415	0.828723	0.683997	0.66749	0.509192	0.554071	0.511705	0.611883	0.503917	0.855093	0.790573	0.875718	0.734512	0.725057	0.801435	0.584992	0.647551	0.610796	0.684157	0.694218	0.693718	0.755068	0.636557	0.651342	0.656743	0.678812	0.645652	0.680486	0.661981	0.671338	0.707158
Fe2+	0.208878	0.262374	0.20469	0.18906	0.211413	0.216059	0.196556	0.21168	0.187171	0.138868	0.201337	0.168228	0.202459	0.276289	0.287882	0.38623	0.230125	0.206418	0.236636	0.234047	0.225205	0.264358	0.345969	0.330441	0.31114	0.348783	0.295683	0.118128	0.12217	0.0882453	0.217777	0.207437	0.196273	0.325005	0.303691	0.283954	0.290281	0.274814	0.285907	0.290695	0.302265	0.276203	0.284101	0.239353	0.241461	0.223292	0.244107	0.183602	0.232448
Mn	0.00523842	0.00851393	0.00162398	0.00158217	0.00662351	0.00777012	0.00654495	0.00667594	0.00905523	0.00629295	0.00615709	0.00381209	0.00684408	0.00713297	0.00649271	0.0138314	0.00679052	0.00375512	0.0058314	0.00518415	0.00433704	0.0049702	0.00162388	0.00603134	0.00531123	0.00711762	0.00643714	0.0051554	0.00305394	0.00354871	0.00640824	0.00551075	0.00483086	0.0122038	0.00951011	0.0102459	0.00680554	0.007946	0.00935595	0.00857132	0.00776932	0.00836388	0.00734625	0.00521358	0.00508225	0.00632004	0.00489275	0.00578987	0.00653176
Ca	0.886455	0.8537	0.886097	0.77365	0.90927	0.888071	0.891743	0.895536	0.894802	0.916463	0.889676	0.885529	0.897729	0.751267	0.80603	0.77876	0.768047	0.796303	0.73684	0.732985	0.796598	0.768599	0.748936	0.762961	0.759983	0.749803	0.762195	0.776374	0.734909	0.714578	0.769667	0.799322	0.73545	0.839063	0.842643	0.842747	0.853258	0.847968	0.812087	0.77438	0.832143	0.839928	0.83865	0.846672	0.853302	0.842773	0.839801	0.88095	0.85613
Na	0.0391368	0.0402191	0.0427868	0.0600778	0.0354507	0.0359315	0.0494769	0.032026	0.0357834	0.0511055	0.0310942	0.0551932	0.0431014	0.069268	0.07951	0.065521	0.0747699	0.0574752	0.0456136	0.0447513	0.058625	0.0643028	0.0911806	0.077097	0.0937259	0.0742633	0.0967681	0.0574603	0.103731	0.110365	0.0557855	0.0572341	0.0636385	0.0415785	0.0381882	0.040465	0.0329854	0.0311091	0.0399487	0.0420336	0.038981	0.0401768	0.0434901	0.0361668	0.0425606	0.0400739	0.0442253	0.0471883	0.0404791
P	0.00240915	0	0.00206878	0.00189148	0.00131127	0.000438424	0.000382934	6.38538e-05	0.00174666	0.00110627	0.00272812	0.00222265	0.000598962	0.00053393	0.000383621	0	9.42674e-05	0.000922424	0.00028052	0.00277811	0.00107583	0	0	0	0	0	0	0	0	0	0	0	0	0	0	0	0	0	0	0	0	0	0	0	0	0	0	0	0
Total	1.99894	1.99874	1.99875	1.99318	2	1.99442	1.99684	1.9984	1.99783	1.99865	1.99694	1.99567	1.99772	1.99434	1.99893	1.99663	1.99724	1.99861	1.98813	1.98839	1.99132	1.99561	1.99403	1.9922	1.99587	1.99761	1.99566	1.98151	1.97568	1.9722	1.98313	1.98862	1.98357	1.99858	1.99667	1.99817	1.99614	1.9959	1.99525	1.99712	1.99806	1.99657	1.99217	1.99833	1.99649	1.99364	1.99464	1.99745	1.9971
En	34.2754	34.8329	36.1549	43.3445	36.8593	38.4666	32.4567	39.2498	39.0207	34.0722	39.6118	37.2489	36.4159	38.2834	33.0518	32.6483	39.503	37.2945	44.7582	44.9004	38.159	37.7062	29.9481	32.0161	29.9748	34.1481	29.3418	47.1851	45.0613	48.8558	41.1688	40.403	44.4839	32.4483	35.1395	33.5702	36.6352	37.1913	37.6812	40.3618	34.5216	35.2089	35.1303	37.582	36.1091	37.9535	36.879	36.4087	38.3752
Fs	13.5794	16.8639	12.4134	10.544	13.4171	12.8955	15.5445	11.576	12.387	14.5381	12.2856	12.4048	13.1308	15.8447	16.7082	21.6539	13.2743	13.7652	13.0686	12.9616	14.1296	15.2436	20.6405	19.4425	20.0163	19.8622	20.643	6.80291	7.13755	5.12114	12.5654	11.8663	11.1624	18.7043	17.062	17.8873	15.9084	15.7139	16.0381	15.9971	18.2357	17.2162	17.6825	13.5403	13.7883	12.8064	13.8718	13.2555	12.9687
Wo	49.9403	46.1299	49.0626	42.7888	47.8577	46.7465	49.2654	47.4763	46.7238	48.6754	46.4782	47.3925	48.1419	41.9995	45.7291	42.1514	43.0334	45.6457	39.7146	39.7133	44.4408	43.4178	44.0486	44.0865	44.5186	41.8452	44.3806	42.8413	41.8886	39.8659	43.1391	44.5414	40.8214	46.5411	45.7262	46.3185	45.6902	45.4282	44.1108	41.3941	45.1286	45.4031	44.8608	46.8754	47.7223	47.005	46.7854	47.7766	46.4594
Ac	2.20486	2.17325	2.36908	3.32276	1.86588	1.89137	2.73341	1.69784	1.8685	2.71433	1.62442	2.95387	2.31137	3.87242	4.5109	3.54641	4.18933	3.2946	2.45851	2.42464	3.27058	3.63243	5.36278	4.45493	5.49031	4.1445	5.63456	3.17073	5.91251	6.15718	3.12673	3.18931	3.53228	2.30627	2.07229	2.22401	1.7663	1.66661	2.16993	2.24689	2.11401	2.1718	2.32636	2.00235	2.38027	2.23509	2.4638	2.55916	2.19667
Mg#-pyroxene	74.4422	71.0725	76.1341	80.5646	76.8116	77.1808	74.9306	77.7657	79.9699	82.205	79.0182	80.5342	77.0331	71.2524	66.9275	60.9639	75.392	75.9148	77.8234	77.9777	75.2305	71.6308	59.3112	62.6415	60.3358	63.6936	59.1449	87.8622	86.6151	90.8456	77.1312	77.7546	80.3276	64.2851	67.9873	65.9605	70.2104	70.8682	70.8146	72.2026	65.9615	67.7447	67.0172	73.9314	72.7812	75.2935	73.0593	73.7761	75.2611
Mg#-melt	59.3803	57.1028	57.1028	57.1028	43.2038	43.2038	43.2038	48.3803	43.2038	43.2038	43.2038	43.2038	43.2038	45.9246	45.9246	45.9246	45.9246	45.9246	45.9246	47.0852	47.0852	47.0852	45.9246	45.9246	45.9246	45.9246	45.9246	59.8662	59.8662	57.1028	59.8662	59.8662	57.1028	57.1028	57.1028	57.1028	57.1028	57.1028	57.1028	57.1028	57.1028	57.1028	57.1028	57.1028	57.1028	57.1028	57.1028	57.1028	57.1028
Cpx-melt equilibrium therobarometer (Putirka 2008)
Eqn 30 P (kbar)				13.9885	9.13926	9.26555	11.8667	8.62001			8.32635		10.5626	14.4711			14.8689	13.3703	11.2791	11.3129	13.1411	14.0086						13.808	18.6303	18.5187
Eqn 33 T (°C )				1210.32	1036.97	1044.47	1066.65	1043.14			1038.71		1050.5	1157.31			1156.32	1140.87	1126	1131	1130.93	1143						1216.91	1269.34	1259.11
Equition 32 based on the Cpx composition only (Putirka 2008)
Eqn 32a (kbar)	7.41867	11.2219	10.4355	15.7607	5.64549	6.29682	11.9593	6.3653	5.10325	2.91415	4.86083	13.234	7.98328	13.6624	14.7255	11.5964	14.4097	17.7208	11.3303	7.75925	9.34531	11.8337	21.1937	18.5129	22.8712	17.4766	22.4511	14.7592	22.4628	21.9867	9.09539	10.1312	15.2505	10.8773	11.7631	15.2964	8.53918	7.29264	9.20223	8.636	13.7003	10.9556	7.21553	11.3945	11.5072	11.4142	12.7142	11.8068	7.47275
Eqn. 32d (°C )	1054.55	1190.61	1143.88	1268.07	1146.35	1167.23	1106.79	1178.25	1154.94	989.571	1168.6	1188.4	1144.19	1220.93	1187.72	1205.39	1226.81	1200.41	1241.25	1171.13	1130.11	1157.4	1211.75	1220.25	1222.15	1230.74	1211.03	1313.05	1354.85	1368.88	1153.06	1165.74	1277.05	1200.79	1218.41	1235.62	1200.35	1187	1205.5	1218.19	1208.13	1193.66	1131.99	1178.91	1171.57	1184.87	1182.07	1172.07	1172.21
[truncated: 57 more columns]

## Sheet: Table S5
Table S5. Amphibole major elemental compositions (wt.%) analyzed by EMPA in the Tuoyun monchiquite Ⅰ and camptonite
Data	TY-05-02-Q2-AM	TY-05-02-Q4-AM	ty-04-05 q7-am	TY-05-02-Q8-AM	TY-05-02-Q9-AM	TY-05-02-Q11- AM1	TY-05-02-Q11- AM2	TY-05-04-Q4-1	L-3-B	B-1-1-P1(L)	B-3-6-P1(L)	L-2-1-P1	L-2-1-P1	B-3-3-P1	B-3-4-P1	B-4-1-P1	B-4-2-P1	B-5-1-P1	B-5-5-P1	L-1-3-P3	L-1-3-P4	L-1-2-P1	L-7-2-P2	L-7-3-P1	L-7-3-P2	L-3-1-P2	L-3-1-P1	L-6-1-P2	L-6-1-P1	TY-J-1-Q1-1	TY-J-1-Q1-2	TY-J-1-Q1-3	TY-J-1-Q1-4	TY-J-1-Q1-5	TY-J-1-Q3-1	TY-J-1-Q3-2	TY-J-1-Q3-3	TY-J-1-Q3-4	TY-J-1-Q3-5	TY-04-13-3	TY-J-1-Q2-1	TY-J-1-Q2-2	TY-J-1-Q2-3	TY-04-13-Q1-1	TY-04-13-Q1-2	TY-04-13-Q1-3	TY-04-13-Q3-1	TY-04-13-Q3-2	TY-04-13-Q3-3
Comments	Phenocrysts in the camptonite																						Megacrysts in the monchiquite Ⅰ							Hornblendite xenoliths in the monchiquite Ⅰ				rim
SiO2	40.319	39.763	40.391	40.254	40.558	39.927	39.328	39.798	39.161	38.645	38.208	39.643	39.643	38.646	38.724	38.881	38.725	38.537	38.711	39.595	40.509	40.438	40.14	39.981	40.779	40.736	40.011	39.483	39.634	38.171	39.142	39.296	38.771	39.066	39.086	39.433	38.558	38.472	39.294	40.081	39.787	38.885	38.896	39.203	38.564	38.788	38.614	39.022	38.848
TiO2	5.308	6.482	3.736	5.287	4.631	6.24	6.625	5.643	5.102	3.599	3.087	5.444	5.444	4.255	3.348	4.453	4.087	3.078	3.825	5.333	4.957	6.133	5.92	5.006	4.255	5.684	5.662	4.949	4.918	6.721	5.998	6.41	6.072	6.107	3.364	3.444	3.335	3.401	3.242	2.778	5.288	4.855	5.012	2.941	2.798	3.41	4.169	4.004	4.212
Al2O3	12.978	13.506	12.577	12.936	12.881	13.347	13.141	13.11	12.76	12.918	12.34	11.661	11.661	12.697	12.778	12.086	12.994	13.662	13.451	12.56	11.302	12.959	13.063	13.316	13.243	13.247	13.211	12.806	12.847	14.244	14.034	14.264	14.035	13.929	13.949	14.058	14.068	13.993	14.405	12.975	13.576	13.138	13.194	12.857	13.639	11.339	12.998	12.856	13.494
Cr2O3		0.003	0.015			0.035	0.048	0.019	0	0.029	0	0.017	0.017	0.019	0	0	0	0.001	0.002	0.011	0	0.01	0.017	0.03	0.11	0.017	0.004	0	0.006	0.06	0.087	0.002	0.034	0.037	0.012	0	0.087	0	0.027		0	0.033	0.017	0.009	0.021	0	0.006	0	0.001
FeO	12.631	12.697	16.059	16.18	17.857	13.914	12.64	14.109	13.995	15.229	21.443	12.889	12.889	17.653	18.438	16.859	16.083	15.119	14.559	12.539	13.044	12.472	12.252	12.911	13.191	9.258	9.194	13.508	13.36	10.772	11.016	11.06	11.326	10.728	17.578	16.775	17.583	17.35	15.708	18.653	13.259	14.34	16.395	21.206	19.725	23.213	18.905	19.184	18.122
MnO	0.164	0.167	0.326	0.312	0.385	0.149	0.186	0.148	0.199	0.23	0.376	0.218	0.218	0.282	0.339	0.327	0.287	0.266	0.253	0.215	0.229	0.132	0.137	0.138	0.129	0.126	0.097	0.181	0.165	0.083	0.132	0.136	0.127	0.158	0.352	0.253	0.361	0.308	0.224	0.352	0.196	0.236	0.218	0.429	0.333	0.439	0.367	0.379	0.367
MgO	11.068	10.449	8.946	8.934	8.392	9.965	10.588	10.332	9.992	9.488	5.589	11.047	11.047	7.517	7.537	7.939	8.668	9.645	9.739	11.184	11.081	10.946	10.648	10.371	10.421	12.856	12.572	10.419	10.369	11.386	11.299	11.066	11.338	11.947	8.082	9.053	8.191	8.323	9.728	7.625	10.676	10.126	9.134	6.477	7.053	5.193	7.127	7.268	7.458
CaO	10.876	10.769	11.239	10.334	10.16	10.821	10.761	11.054	12.084	11.853	11.519	12.021	12.021	11.592	11.883	11.798	11.977	11.905	12.287	12.04	11.756	10.45	10.926	10.889	10.526	11.009	10.864	10.961	10.814	11.374	11.373	11.303	11.187	11.317	11.631	11.824	11.591	11.753	11.838	11.075	11.026	10.707	10.641	11.413	11.09	11.128	11.273	11.504	11.538
Na2O	2.371	2.274	2.576	2.557	2.446	2.398	2.482	2.593	2.307	2.394	2.45	2.413	2.413	2.428	2.462	2.592	2.457	2.351	2.288	2.41	2.504	2.714	2.733	2.646	2.575	2.425	2.918	2.416	2.4	2.084	2.245	2.085	2.055	2.083	2.453	2.398	2.236	2.292	2.445	2.578	2.357	2.36	2.372	2.458	2.411	2.492	2.484	2.425	2.632
K2O	1.481	1.402	1.504	1.461	1.444	1.464	1.37	1.529	1.567	1.538	1.547	1.458	1.458	1.501	1.513	1.432	1.456	1.501	1.491	1.419	1.414	1.231	1.233	1.386	1.513	2.187	2.358	2.378	2.298	2.105	2.014	1.966	2.006	1.956	1.571	1.515	1.604	1.493	1.454	1.472	2.334	2.085	2.205	1.518	1.573	1.751	1.557	1.531	1.59
Sum	97.196	97.512	97.369	98.255	98.754	98.26	97.169	98.335	97.387	96.135	96.582	96.884	96.884	96.642	97.045	96.379	96.887	96.08	96.683	97.735	96.905	97.493	97.118	96.728	96.754	97.573	97.173	97.199	97.045	97	97.34	97.588	96.951	97.328	98.078	98.753	97.614	97.385	98.365	97.589	98.499	96.765	98.084	98.511	97.207	97.753	97.5	98.173	98.262
Number of ions (apfu) calculated on the basis of 23O atoms
Si	0.671044	0.66179	0.672242	0.669962	0.675022	0.66452	0.65455	0.662373	0.651771	0.643183	0.63591	0.659793	0.659793	0.6432	0.644498	0.647111	0.644514	0.641385	0.644281	0.658994	0.674206	0.673024	0.668065	0.665418	0.6787	0.677984	0.665918	0.65713	0.659643	0.635294	0.651455	0.654018	0.64528	0.65019	0.650523	0.656298	0.641735	0.640304	0.653984	0.667083	0.66219	0.647177	0.64736	0.65247	0.641835	0.645563	0.642667	0.649457	0.646561
Ti	0.0664347	0.0811284	0.0467596	0.0661719	0.0579614	0.0780996	0.0829182	0.0706276	0.0638564	0.0450449	0.0386368	0.0681369	0.0681369	0.0532554	0.0419034	0.0557336	0.0511527	0.0385241	0.0478735	0.0667476	0.0620416	0.0767604	0.0740945	0.0626549	0.0532554	0.0711407	0.0708654	0.0619415	0.0615535	0.0841198	0.0750707	0.0802273	0.0759969	0.076435	0.0421037	0.043105	0.0417407	0.0425668	0.0405767	0.0347693	0.0661844	0.060765	0.06273	0.0368094	0.0350197	0.0426794	0.052179	0.0501139	0.0527172
Al	0.254568	0.264925	0.246702	0.253744	0.252665	0.261806	0.257765	0.257157	0.250292	0.253391	0.242053	0.228735	0.228735	0.249056	0.250645	0.237071	0.254882	0.267985	0.263846	0.246369	0.221693	0.254195	0.256235	0.261198	0.259766	0.259844	0.259138	0.251194	0.251998	0.279401	0.275282	0.279793	0.275301	0.273222	0.273614	0.275752	0.275949	0.274477	0.282559	0.254509	0.266298	0.257706	0.258805	0.252194	0.267534	0.222418	0.25496	0.252175	0.264689
Cr	0	3.94762e-05	0.000197381	0	0	0.000460556	0.00063162	0.000250016	0	0.000381604	0	0.000223699	0.000223699	0.000250016	0	0	0	1.31587e-05	2.63175e-05	0.000144746	0	0.000131587	0.000223699	0.000394762	0.00144746	0.000223699	5.2635e-05	0	7.89525e-05	0.000789525	0.00114481	2.63175e-05	0.000447397	0.000486873	0.000157905	0	0.00114481	0	0.000355286	0	0	0.000434239	0.000223699	0.000118429	0.000276334	0	7.89525e-05	0	1.31587e-05
Fe	0.175807	0.176725	0.22352	0.225204	0.248546	0.193664	0.175932	0.196378	0.194792	0.211967	0.298458	0.179398	0.179398	0.245706	0.256632	0.234655	0.223854	0.210436	0.202642	0.174526	0.181555	0.173594	0.170531	0.179704	0.183601	0.128859	0.127968	0.188013	0.185953	0.149932	0.153328	0.15394	0.157643	0.149319	0.244662	0.233486	0.244732	0.241489	0.218634	0.259625	0.184548	0.199594	0.228196	0.295159	0.274546	0.323094	0.263132	0.267016	0.252234
Mn	0.00231191	0.0023542	0.00459563	0.00439827	0.00542735	0.00210046	0.00262204	0.00208636	0.00280531	0.00324231	0.00530048	0.00307315	0.00307315	0.00397536	0.00477889	0.00460972	0.00404584	0.00374981	0.00356654	0.00303086	0.00322822	0.00186081	0.00193129	0.00194539	0.00181852	0.00177622	0.00136741	0.00255156	0.00232601	0.00117005	0.00186081	0.00191719	0.00179032	0.00222733	0.00496215	0.00356654	0.00508902	0.00434188	0.00315773	0.00496215	0.00276302	0.0033269	0.00307315	0.00604762	0.00469431	0.00618859	0.0051736	0.00534277	0.0051736
Mg	0.274613	0.259255	0.221963	0.221665	0.208218	0.247246	0.262703	0.256352	0.247916	0.235411	0.138671	0.274092	0.274092	0.186508	0.187004	0.196978	0.215066	0.239306	0.241639	0.277491	0.274935	0.271586	0.264192	0.257319	0.25856	0.318976	0.311929	0.25851	0.25727	0.282503	0.280344	0.274563	0.281312	0.296422	0.200526	0.224618	0.20323	0.206506	0.241366	0.189187	0.264887	0.251241	0.226628	0.160704	0.174995	0.128846	0.176831	0.180329	0.185044
Ca	0.193941	0.192033	0.200414	0.184276	0.181173	0.19296	0.19189	0.197115	0.215482	0.211363	0.205407	0.214358	0.214358	0.206708	0.211898	0.210382	0.213574	0.21229	0.219102	0.214697	0.209633	0.186344	0.194832	0.194173	0.187699	0.196312	0.193727	0.195456	0.192835	0.202821	0.202803	0.201555	0.199486	0.201805	0.207404	0.210845	0.206691	0.209579	0.211095	0.197489	0.196615	0.190927	0.18975	0.203516	0.197757	0.198434	0.20102	0.205139	0.205745
Na	0.0765098	0.0733797	0.0831249	0.0825118	0.07893	0.077381	0.0800916	0.0836735	0.0744446	0.077252	0.079059	0.0778651	0.0778651	0.0783491	0.0794463	0.0836412	0.0792849	0.0758644	0.0738315	0.0777683	0.0808016	0.0875781	0.0881912	0.0853838	0.0830927	0.0782523	0.0941609	0.0779619	0.0774456	0.0672486	0.0724439	0.0672809	0.0663128	0.0672163	0.0791558	0.077381	0.0721535	0.0739605	0.0788977	0.0831895	0.076058	0.0761548	0.0765421	0.0793172	0.0778005	0.0804143	0.0801562	0.0782523	0.084932
K	0.0314454	0.029768	0.0319338	0.0310208	0.0306598	0.0310845	0.0290886	0.0324646	0.0332714	0.0326557	0.0328468	0.0309571	0.0309571	0.0318701	0.0321248	0.030405	0.0309146	0.0318701	0.0316577	0.030129	0.0300228	0.0261373	0.0261797	0.0294283	0.0321248	0.0464356	0.0500664	0.050491	0.0487924	0.0446945	0.0427624	0.0417432	0.0425925	0.0415309	0.0333563	0.0321673	0.034057	0.0317002	0.0308721	0.0312543	0.0495568	0.0442699	0.0468178	0.032231	0.0333988	0.0371782	0.0330591	0.032507	0.0337598
F	0	0	0	0	0	0	0	0	0.0104748	0.00926413	0	0.00100011	0.00100011	0.00173702	0	0	0.00668491	0	0.00347405	0.0211075	0.00473734	0	0.00168439	0.00263186	0	0.000631645	0.00421097	0.00463207	0.0113696	0	0	0	0	0	0	0	0	0	0	0	0	0	0	0	0	0	0	0	0
Cl	0	0	0	0	0	0	0	0	0.000592334	0.00101543	0.000648746	0.00152314	0.00152314	0.000535921	0.000648746	0.000338476	0.000733365	0.000423095	0.00031027	0.000789778	0.000535921	0.000225651	0.000479508	0.000112825	0.000338476	0.000451302	0.00569768	0.000282064	0.000507714	0	0	0	0	0	0	0	0	0	0	0	0	0	0	0	0	0	0	0	0
Si to Mg sum	1.44478	1.44622	1.41598	1.44115	1.44784	1.4479	1.43712	1.44522	1.41143	1.39262	1.35903	1.41345	1.41345	1.38195	1.38546	1.37616	1.39351	1.4014	1.40387	1.4273	1.41766	1.45115	1.43527	1.42863	1.43715	1.4588	1.43724	1.41934	1.41882	1.43321	1.43849	1.44449	1.43777	1.4483	1.41655	1.43683	1.41362	1.40968	1.44063	1.41014	1.44687	1.42024	1.42702	1.4035	1.3989	1.36879	1.39502	1.40443	1.40643
Xal	0.145744	0.152133	0.142483	0.145918	0.145327	0.149661	0.148295	0.146239	0.144291	0.147845	0.144394	0.131712	0.131712	0.1466	0.146668	0.139406	0.148421	0.155676	0.152648	0.14079	0.127548	0.145154	0.146884	0.150319	0.149285	0.145996	0.145978	0.144095	0.145002	0.159843	0.156722	0.159421	0.157661	0.155341	0.15757	0.156926	0.159829	0.159124	0.160408	0.147793	0.150527	0.148826	0.148728	0.146747	0.156649	0.132013	0.149164	0.146585	0.152923
Si	6.038	5.94881	6.1718	6.04346	6.06095	5.96642	5.92097	5.95814	6.00314	6.00406	6.08289	6.06835	6.06835	6.05058	6.04742	6.11299	6.01263	5.94977	5.9661	6.00217	6.1825	6.02922	6.051	6.05504	6.13931	6.04179	6.02331	6.01877	6.044	5.76247	5.88738	5.88599	5.83448	5.83612	5.97	5.938	5.90155	5.90483	5.90143	6.14982	5.94972	5.92384	5.8974	6.04353	5.96458	6.1312	5.98892	6.01164	5.97633
Ti	0.597774	0.729261	0.429296	0.59691	0.52043	0.70122	0.750066	0.635305	0.58815	0.420491	0.369586	0.626679	0.626679	0.500973	0.393187	0.526492	0.4772	0.357367	0.443313	0.607943	0.568924	0.68765	0.671111	0.570134	0.481732	0.633964	0.640986	0.567333	0.563985	0.763013	0.678435	0.722025	0.687147	0.686082	0.386395	0.390002	0.383858	0.392548	0.366157	0.320538	0.594661	0.556204	0.571465	0.340949	0.325438	0.405346	0.486248	0.463874	0.487278
Al	2.29058	2.3814	2.26495	2.28892	2.26866	2.35064	2.33171	2.31317	2.30531	2.36538	2.3154	2.10375	2.10375	2.34287	2.35184	2.23951	2.37778	2.48594	2.44324	2.24395	2.03293	2.27718	2.32085	2.3768	2.34976	2.31558	2.34394	2.30073	2.30894	2.53432	2.4878	2.51807	2.48921	2.45245	2.51102	2.49493	2.53769	2.53121	2.54976	2.34631	2.39266	2.35888	2.35769	2.33596	2.4862	2.11241	2.37594	2.33423	2.44659
Cr	0	0.000354851	0.00181214	0	0	0.00413512	0.00571354	0.00224893	0	0.00356224	0	0.00205743	0.00205743	0.0023519	0	0	0	0.000122066	0.000243702	0.00131836	0	0.00117881	0.00202615	0.00359218	0.0130933	0.00199347	0.00047609	0	0.000723404	0.00716143	0.010346	0.000236851	0.00404527	0.00437019	0.00144913	0	0.010528	0	0.00320603	0	0	0.00397474	0.00203788	0.00109695	0.00256797	0	0.000735746	0	0.000121629
Fe	1.58189	1.58858	2.05212	2.03147	2.23167	1.73882	1.59145	1.76645	1.79413	1.9787	2.85494	1.64998	1.64998	2.31136	2.40802	2.21669	2.08832	1.9521	1.87648	1.5896	1.66487	1.55512	1.54459	1.63523	1.6608	1.14831	1.15749	1.72205	1.7038	1.35996	1.38567	1.38542	1.42537	1.34029	2.24532	2.11251	2.25061	2.22699	1.97291	2.39347	1.65814	1.82695	2.07885	2.73392	2.55136	3.06857	2.45209	2.4716	2.33146
Mn	0.0208024	0.0211618	0.0421921	0.039675	0.0487316	0.018859	0.0237186	0.0187671	0.0258383	0.0302667	0.0507025	0.0282648	0.0282648	0.0373962	0.0448411	0.0435462	0.0377434	0.0347848	0.0330265	0.0276053	0.0296029	0.0166698	0.0174927	0.0177023	0.0164497	0.0158287	0.0123684	0.0233702	0.0213121	0.010613	0.0168166	0.0172543	0.0161877	0.0199926	0.0455388	0.0322691	0.0467999	0.0400405	0.0284948	0.0457459	0.0248255	0.0304523	0.0279961	0.0560163	0.0436243	0.0587758	0.048212	0.0494548	0.0478209
Mg	2.47095	2.33043	2.03783	1.99955	1.86956	2.21991	2.37638	2.30592	2.28343	2.19754	1.32648	2.52092	2.52092	1.75448	1.75469	1.86077	2.00633	2.21991	2.23759	2.52741	2.52117	2.43298	2.39292	2.3415	2.33885	2.84252	2.82144	2.36774	2.35724	2.56246	2.53355	2.471	2.54356	2.66069	1.84027	2.03228	1.86896	1.90438	2.17804	1.74411	2.37999	2.29969	2.06456	1.48852	1.62623	1.22371	1.64786	1.6692	1.7104
Ca	1.74506	1.72618	1.83998	1.66228	1.62673	1.7325	1.73581	1.77308	1.9847	1.97305	1.96485	1.97153	1.97153	1.94451	1.98827	1.98739	1.99242	1.96929	2.0289	1.95548	1.92234	1.66935	1.7647	1.76689	1.69787	1.74942	1.75228	1.79022	1.76686	1.8397	1.83279	1.81394	1.80371	1.8114	1.90339	1.90767	1.90078	1.93272	1.90488	1.82065	1.76657	1.74762	1.72861	1.88508	1.83776	1.88462	1.87327	1.89885	1.90176
Na	0.688429	0.659608	0.763163	0.744306	0.708704	0.694769	0.724497	0.752655	0.685672	0.721141	0.756251	0.716152	0.716152	0.73703	0.745457	0.790125	0.739644	0.703752	0.683686	0.70832	0.740954	0.784559	0.798792	0.776958	0.751631	0.697338	0.851697	0.714067	0.709597	0.609982	0.654696	0.60551	0.599585	0.603335	0.726432	0.700122	0.663541	0.682058	0.711958	0.766922	0.683375	0.697072	0.697292	0.734679	0.723002	0.763731	0.746963	0.724335	0.785047
K	0.282943	0.267584	0.293181	0.279826	0.275291	0.279093	0.263131	0.292024	0.306446	0.304838	0.314201	0.284723	0.284723	0.299802	0.301433	0.287224	0.2884	0.295641	0.293153	0.274417	0.275311	0.234148	0.237123	0.267786	0.290591	0.413807	0.452856	0.462456	0.447062	0.405404	0.386456	0.375678	0.385112	0.372782	0.306119	0.291041	0.313197	0.292337	0.278584	0.288133	0.445263	0.405218	0.426506	0.298541	0.310376	0.353098	0.308073	0.300898	0.31205
F	0	0	0	0	0	0	0	0	0.0964781	0.0864799	0	0.00919832	0.00919832	0.0163402	0	0	0.0623631	0	0.03217	0.192249	0.0434416	0	0.0152564	0.0239488	0	0.00562885	0.0380887	0.0424259	0.104174	0	0	0	0	0	0	0	0	0	0	0	0	0	0	0	0	0	0	0	0
Cl	0	0	0	0	0	0	0	0	0.00545569	0.00947894	0.00620568	0.0140089	0.0140089	0.00504141	0.00608729	0.00319745	0.00684152	0.00392482	0.00287313	0.00719337	0.00491442	0.00202147	0.00434315	0.00102667	0.00306175	0.00402173	0.0515362	0.00258347	0.00465195	0	0	0	0	0	0	0	0	0	0	0	0	0	0	0	0	0	0	0	0
sum	15.7164	15.6534	15.8963	15.6864	15.6107	15.7064	15.7234	15.8178	15.9768	15.999	16.0353	15.9724	15.9724	15.9813	16.0352	16.0647	16.0205	15.9687	16.0057	15.9382	15.9386	15.6881	15.8006	15.8116	15.7401	15.8606	16.0568	15.9667	15.9235	15.8551	15.8739	15.7951	15.7884	15.7875	15.9359	15.8988	15.8775	15.9071	15.8954	15.8757	15.8952	15.8499	15.8524	15.9183	15.8711	16.0014	15.9283	15.9241	15.9989
H2O	1.88932	1.89121	1.85167	1.88457	1.89333	1.8934	1.87931	1.88991	1.75165	1.73374	1.77168	1.82691	1.82691	1.78785	1.80624	1.79671	1.75923	1.829	1.80367	1.68035	1.80904	1.89574	1.8585	1.84488	1.87647	1.89846	1.79524	1.81429	1.75443	1.8742	1.8811	1.88894	1.88016	1.89393	1.85241	1.87893	1.84858	1.84343	1.8839	1.84402	1.89206	1.85724	1.8661	1.83535	1.82933	1.78995	1.82426	1.83657	1.83918
Fe2O3	0	0	0	0.722678	2.94447	0	0	0	0	0	0	0	0	0	0	0	0	0	0	0	0	0	0	0	0	0	0	0	0	0	0	0	0	0	0	0.375522	0.891412	0.29599	0.987056	0.143985	0	0.69359	1.06514	0.781054	1.91	0	0	0	0
FeO	12.631	12.697	16.059	15.5297	15.2075	13.914	12.64	14.109	13.995	15.229	21.443	12.889	12.889	17.653	18.438	16.859	16.083	15.119	14.559	12.539	13.044	12.472	12.252	12.911	13.191	9.258	9.194	13.508	13.36	10.772	11.016	11.06	11.326	10.728	17.578	16.4371	16.7809	17.0837	14.8198	18.5234	13.259	13.7159	15.4366	20.5032	18.0064	23.213	18.905	19.184	18.122
O=F,Cl	0	0	0	0	0	0	0	0	-0.0885314	-0.0822314	-0.00518965	-0.0201847	-0.0201847	-0.0181824	-0.00518965	-0.00270764	-0.0593425	-0.00338455	-0.0302727	-0.175167	-0.0421835	-0.00180509	-0.0173101	-0.0219561	-0.00270764	-0.00866304	-0.0792643	-0.0393106	-0.0950127	0	0	0	0	0	0	0	0	0	0	0	0	0	0	0	0	0	0	0	0
Total	99.0853	99.4032	99.2207	100.212	100.942	100.153	99.0483	100.225	99.0501	97.7865	98.3485	98.6907	98.6907	98.4117	98.8461	98.173	98.5869	97.9056	98.4564	99.2402	98.6719	99.3869	98.9592	98.5509	98.6278	99.4628	98.889	98.974	98.7044	98.8742	99.2211	99.4769	98.8312	99.2219	99.9304	100.67	99.5519	99.2581	100.348	99.4474	100.391	98.6917	100.057	100.425	99.2277	99.543	99.3243	100.01	100.101
T (°C)	1027.62	1027.61				1022.76	1062.6	1042.91	967.208			987.892	987.892							995.22	955.539	1065.87	1074.49	1056.13	1043.43	1072.87	1120.14	1036.15	1034.17			1061.38	1029.34	856.948							1025.8	1045.12
error (°C)	22	22				22	22	22	22			22	22							22	22	22	22	22	22	22	22	22	22			22	22	22							22	22
P (MPa)	794.984	563.1				603.453	672.432	872.604	451.591			390.566	390.566							455.62	312.172	843.705	1054.06	1271.43	1451.59	1203.38	2033.56	1265.09	1266.34			1627.8	995.774	215.612							1727.7	1417.42
error (MPa)	95.398	67.572				72.4144	80.6918	104.712	54.1909			46.8679	46.8679							54.6744	37.4607	101.245	126.488	152.572	174.19	144.406	244.028	151.811	151.961			195.336	119.493	25.8735							207.324	170.091
H2Omelt (wt%)	4.65963	3.23552				3.53365	3.07759	4.60101	4.72915			3.70665	3.70665							4.05943	3.56173	3.6765	4.58764	6.07774	6.95425	4.42022	4.97551	5.79129	5.83629			7.93739	7.16552	6.06995							10.1423	8.26092
error (wt%)	0.792137	0.550039				0.60072	0.52319	0.782171	0.803955			0.63013	0.63013							0.690103	0.605495	0.625005	0.779898	1.03322	1.18222	0.751437	0.845837	0.98452	0.99217			1.34936	1.21814	1.03189							1.72419	1.40436
Overall	OK	OK	WRONG	WRONG	WRONG	OK	OK	OK	OK	WRONG	WRONG	OK	OK	WRONG	WRONG	WRONG	WRONG	WRONG	WRONG	OK	OK	OK	OK	OK	OK	OK	OK	OK	OK	WRONG	WRONG	OK	OK	OK	WRONG	WRONG	WRONG	WRONG	WRONG	WRONG	OK	OK	WRONG	WRONG	WRONG	WRONG	WRONG	WRONG	WRONG
[truncated: 76 more columns]

## Sheet: Table S6
Table S6. The water contents in the clinopyroxene megacrysts (ppm) and the corresponding melt (wt.%) of the monchiquite Ⅰ based on FTIR
Sample	Absorption/S	H2O contents in Cpx/ppm	D	H2O contents in the melt
B	31.8665	642.081	0.04	4.81561
C	26.9389	542.795	0.04	4.07096
D	30.2516	609.543	0.04	4.57158
E	26.0263	524.406	0.04	3.93304
F	29.3098	590.567	0.04	4.42925
G	33.5278	675.555	0.04	5.06666
H	29.4396	593.182	0.04	4.44887
I	24.1235	486.067	0.04	3.6455
J	29.6112	596.639	0.04	4.47479
K	27.2114	548.285	0.04	4.11214
L	28.0861	565.91	0.04	4.24432
M	19.9114	401.198	0.04	3.00898
N	35.1872	708.99	0.04	5.31742
O	30.5525	615.606	0.04	4.61704
P	26.8947	541.904	0.04	4.06428
Q	27.0139	544.306	0.04	4.0823
R	35.5439	716.178	0.04	5.37134
S	25.4172	512.135	0.04	3.84101
T	23.0648	464.734	0.04	3.48551
U	29.9529	603.524	0.04	4.52643
V	36.5134	735.712	0.04	5.51784
W	46.9653	946.308	0.04	7.09731
Average		598.437		4.48828
AA	21.2402	427.971	0.04	3.20979
AB	25.4228	512.247	0.04	3.84185
AC	25.9958	523.793	0.04	3.92844
AD	25.3906	511.597	0.04	3.83698
AE	28.6638	577.55	0.04	4.33163
AF	32.5558	655.971	0.04	4.91978
AG	31.3793	632.266	0.04	4.74199
AH	33.4633	674.255	0.04	5.05691
AI	28.4295	572.83	0.04	4.29622
AJ	24.0684	484.956	0.04	3.63717
AK	32.831	661.515	0.04	4.96136
AL	27.1386	546.819	0.04	4.10114
AM	30.392	612.371	0.04	4.59278
AN	28.889	582.087	0.04	4.36566
AO	25.1653	507.058	0.04	3.80293
AP	31.5285	635.272	0.04	4.76454
AQ	26.3076	530.075	0.04	3.97557
AR	27.4115	552.317	0.04	4.14238
AS	30.3297	611.116	0.04	4.58337
AT	30.2015	608.532	0.04	4.56399
AU	40.9843	825.797	0.04	6.19348
AV	26.1798	527.499	0.04	3.95625
AW	31.9833	644.436	0.04	4.83327
AX	31.7412	639.558	0.04	4.79668
AY	32.5431	655.714	0.04	4.91786
AZ	32.088	646.544	0.04	4.84908
Average		590.775		4.43081
BA	32.7556	659.996	0.04	4.94997
BB	29.1115	586.571	0.04	4.39928
BC	28.8639	581.582	0.04	4.36187
BD	31.5619	635.943	0.04	4.76958
BE	26.8597	541.199	0.04	4.059
BF	31.2122	628.899	0.04	4.71674
BG	30.0287	605.051	0.04	4.53788
BH	36.2102	729.604	0.04	5.47203
BI	36.9577	744.664	0.04	5.58498
BJ	29.5225	594.852	0.04	4.46139
BK	30.516	614.869	0.04	4.61152
BL	33.8259	681.562	0.04	5.11172
BM	37.1255	748.045	0.04	5.61034
BN	34.6287	697.736	0.04	5.23302
BO	33.5896	676.8	0.04	5.076
BP	34.8714	702.627	0.04	5.2697
BQ	31.3606	631.889	0.04	4.73917
BT	40.234	810.678	0.04	6.08009
BU	41.2506	831.163	0.04	6.23372
BW	43.6494	879.495	0.04	6.59622
BX	37.1532	748.604	0.04	5.61453
BY	36.5803	737.061	0.04	5.52796
BZ	37.8634	762.914	0.04	5.72185
Average		688.339		5.16255

## Sheet: Table S7
Table S7. The major (wt.%) and trace elements (ppm) of standards of AGV-2 and GSR-3
Standards	SiO2	TiO2	Al2O3	TFe2O3	MnO	MgO	K2O	CaO	Na2O	P2O5	LOl	Standards	Li	P	K	Sc	Ti	V	Cr	Mn	Co	Ni	Cu	Zn	Ga	Rb	Sr	Y	Zr	Nb	Cs	Ba	La	Ce	Pr	Nd	Sm	Eu	Gd	Tb	Dy	Ho	Er	Tm	Yb	Lu	Hf	Ta	Pb
GSR-3.1	45.069	2.50379	13.6984	13.8793	0.172605	7.78337	2.29208	8.92121	3.4726	1.07469	2.24	GSR3-01.D	9.432	4572	20780	14.546	14571	164.76	139.46	1318.4	49.48	146.18	49.94	152.08	26.14	39.82	1176	22.44	281.34	70.08	0.6412	519.8	57.54	109.8	12.956	52.48	10.556	3.238	8.796	1.1506	5.734	0.924	1.9886	0.2696	1.4262	0.17602	6.496	4.736	6.254
GSR-3.2	45.2797	2.51652	13.9251	13.9297	0.173363	7.89426	2.27758	8.72488	3.42674	1.00721	2.24	GSR3-02.D	9.044	4490	20740	14.85	14963.4	162.1	131.94	1330.4	49.74	147.66	49.92	152.06	25.84	38.34	1136.4	22.62	285.3	65.31	0.63364	515.6	57.14	110.32	12.904	52.12	10.54	3.226	8.666	1.1476	5.732	0.917	1.987	0.2676	1.4574	0.18422	6.452	4.364	6.23
GSR-3.3	45.2575	2.47443	13.8808	13.9716	0.174257	7.72307	2.31964	8.86073	3.39432	0.997669	2.24	GSR3-03.D	10.004	4372	20420	15.106	15045	171	138.48	1351	48.76	147.96	49.64	152.56	25.18	38.68	1148.2	22.96	287.46	65.31	0.6244	516.4	57.72	109.8	12.762	51.82	10.41	3.206	8.768	1.1503	5.664	0.9064	1.975	0.2718	1.4229	0.18132	6.394	4.166	6.228
GSR-3.4	44.9959	2.44685	13.6556	13.8658	0.175634	7.60626	2.25638	8.70025	3.37068	1.0767	2.24	GSR3-04.D	9.748	4580	20960	15.008	14481.8	166.6	132.9	1356.4	47.24	145.44	50.4	155.04	25.06	39.82	1122.4	23.14	291.24	66.234	0.611452	515.6	55.24	108.9	12.454	50.62	10.186	3.136	8.982	1.1794	5.56	0.8836	1.9234	0.2672	1.4128	0.17589	6.254	4.691	7.142
GSR-3.5	44.9782	2.478	13.8332	13.5031	0.175632	7.80626	2.29134	8.79117	3.39598	1.08718	2.24	GSR3-05.D	9.376	4604	20540	14.552	15020.8	170.6	134.74	1391	47.7	150.5	51.08	157.44	25.12	39.48	1166.6	22.94	292.68	66.724	0.603174	519.8	54.68	105.5	12.616	51.68	9.77	3.02	8.668	1.1422	5.344	0.8558	1.8554	0.2698	1.4664	0.18499	6.784	4.422	6.896
GSR-3.6	45.8438	2.50931	14.0309	13.2547	0.169419	7.80895	2.33031	8.87994	3.36876	1.0439	2.24	GSR3-06.D	9.294	4358	20380	14.356	15055.2	176.8	142.78	1381.4	48.48	142.72	50.66	154.9	24.64	39.66	1198	22.5	285.12	68.302	0.598104	517.8	53.46	103.22	12.778	52.8	9.582	3.196	8.564	1.1564	5.678	0.8456	1.8808	0.2716	1.414	0.1783	6.692	4.278	6.872
GSR-3.7	45.2609	2.48778	13.6886	13.1708	0.177601	7.76518	2.26307	8.75014	3.38574	1.09014	2.24	GSR3-07.D	9.164	4598	20940	14.908	14676.2	163.4	136.02	1393.6	47.14	142.44	50.84	153.4	24.88	37.62	1114.6	22.82	288.9	66.738	0.602888	521	54.6	106.28	12.656	51.98	9.846	3.122	8.754	1.1488	5.418	0.8638	1.8696	0.2692	1.4684	0.18236	6.838	4.482	7.01
GSR-3.8	45.5267	2.50736	13.6984	13.6702	0.178283	7.65661	2.28003	8.87324	3.35769	1.09148	2.24	GSR3-08.D	9.884	4544	20674	13.648	14326.2	171.4	136.8	1421	48.8	148.52	49	149.6	23.8	37.96	1144.2	21.46	276.12	67.665	0.62524	515.2	54.58	109.44	12.846	53.86	9.948	3.364	7.962	1.1624	5.776	0.8954	1.9154	0.2701	1.4566	0.17906	6.572	4.688	6.59
GSR-3.9	45.2395	2.52399	13.5211	13.3637	0.1726	7.72548	2.31536	8.72918	3.33951	1.09955	2.24
AGV-2.1	59.7888	1.04514	16.5416	6.52221	0.0973843	1.74019	2.90045	5.32342	4.02288	0.45424	N.A.	AGV-2-01.D	10.57	2224	25240	12.434	6470	122.58	16.984	797	16.106	18.876	51.78	89.56	20.38	67.3	652	19.786	241	15.28	1.116	1174.2	38.48	70.6	8.202	30.86	5.62	1.5552	4.892	0.6232	3.574	0.6908	1.8134	0.2684	1.646	0.2604	4.802	0.834	12.766
AGV-2.2	60.8889	1.04214	16.4974	6.79439	0.0962222	1.65363	2.91924	5.31754	4.16031	0.453242	N.A.	AGV-2-02.D	10.978	2236	25840	12.486	6524	122.82	17.322	770	16.26	19.01	51.5	88.18	20.56	67.52	657.6	19.606	240.2	15.74	1.0742	1134.4	35.24	68.7	7.86	29.68	5.402	1.4958	4.722	0.6174	3.46	0.6756	1.7524	0.2512	1.5766	0.2406	4.872	0.8646	12.298
AGV-2.3	60.0492	1.06116	15.7355	6.75383	0.100716	1.80984	3.01175	5.32426	4.18949	0.469638	N.A.	AGV-2-03.D	11.386	2260	23740	12.78	6478	123.14	17.71	792.2	16.626	19.576	52.34	89.26	19.864	65.54	643.2	19.702	244.2	15.68	1.1	1098.6	36.68	64.3	7.964	29.36	5.978	1.4832	4.826	0.6448	3.564	0.6602	1.6914	0.2527	1.6152	0.252	4.842	0.8846	12.998
AGV-2.4	60.0358	1.04615	15.9962	6.96657	0.103892	1.87153	3.04572	5.26549	4.14558	0.479812	N.A.	AGV-2-04.D	11.16	2222	24780	12.328	6428	121.02	17.604	780	16.254	20.14	54	91.76	20.3	67.3	667.8	19.532	238	15.66	1.1314	1110.8	36.46	66.72	7.941	28.91	5.828	1.4898	4.458	0.6458	3.662	0.6724	1.6824	0.2474	1.5796	0.2272	4.954	0.8304	12.466
AGV-2.5	59.5415	1.02913	16.0212	6.83128	0.106836	1.92625	3.0021	5.17231	4.13726	0.47775	N.A.	AGV-2-05.D	10.874	2194	24880	12.266	6488	121.98	17.884	799.8	16.396	20.04	53.26	90.06	20.14	67.26	664.2	19.816	240.6	15.722	1.1228	1087	36.96	66.5	7.968	29.52	5.576	1.4914	4.782	0.6552	3.602	0.6852	1.7166	0.2512	1.5312	0.2594	4.83	0.8594	12.112
AGV-2.6	59.5045	1.04514	16.2739	6.82106	0.108308	1.9571	3.06235	5.34861	4.05454	0.486411	N.A.
AGV-2.7	59.7926	1.06016	15.9646	6.76591	0.108231	1.95013	2.90138	5.34693	4.08255	0.487511	N.A.
AGV-2.8	60.4197	1.05816	16.3727	6.80714	0.109548	2.03172	2.92138	5.41913	4.09093	0.489573	N.A.
[truncated: 2 more columns]

## Sheet: Table S8
Table S8. Major (wt.%) and trace elements (ppm) of the Tuoyun monchiquite Ⅰ, Ⅱ and camptonite
Sample	TY-04-01	TY-05-02	TY-05-03	TY-05-05	TY-02-01	TY-02-02	TY-04-02	TY-04-03	TY-03-04	TY-04-05	TY-04-06	TY-04-09	TY-04-11	TY-04-13	TY-04-19	TY-04-22
Discription	camptonite	camptonite	camptonite	camptonite	monchiquite Ⅰ	monchiquite Ⅰ	monchiquite Ⅰ	monchiquite Ⅰ	monchiquite Ⅱ	monchiquite Ⅱ	monchiquite Ⅱ	monchiquite Ⅱ	monchiquite Ⅱ	monchiquite Ⅱ	monchiquite Ⅱ	monchiquite Ⅱ
SiO2	50.1884	48.6855	48.8991	47.3604	48.6048	46.5064	46.9423	47.5077	48.0167	51.1893	47.8897	50.9144	48.6792	50.272	47.9077	47.2234
TiO2	2.32138	2.33812	2.37881	2.50758	2.07923	2.16221	2.12629	2.14354	1.70744	1.73946	1.65134	1.5627	1.78476	1.68817	1.80402	1.81396
Al2O3	13.501	14.6932	14.0286	14.615	13.7441	15.2118	14.8235	14.0377	15.4013	14.1551	15.9184	14.8466	15.4376	14.3841	15.3579	15.4359
TFeO	9.82609	9.82641	10.2368	10.2865	9.2539	9.3993	9.21251	9.1017	8.56529	8.4684	8.19608	7.86609	8.57221	8.56032	9.08475	9.1394
MnO	0.164462	0.113832	0.156076	0.151009	0.180965	0.149555	0.147661	0.174438	0.161635	0.202255	0.153287	0.189248	0.157709	0.188991	0.196178	0.192944
MgO	4.42959	4.85768	4.8299	4.52867	6.84353	7.05172	7.48188	7.54261	4.92703	3.57875	4.66548	4.04208	4.46255	4.45728	5.05294	5.36728
CaO	6.66427	6.63717	7.1122	8.46194	7.70797	7.66757	7.6217	8.0688	6.4262	6.36875	6.03547	5.96394	6.46778	6.42143	6.56009	6.90777
Na2O	3.77917	4.20399	4.2735	3.38358	4.06185	4.41184	4.168	3.99871	5.01896	5.16496	5.29446	5.23296	5.26248	5.19057	4.74945	4.55187
K2O	2.39165	2.19081	2.10347	2.63394	2.8486	3.06229	2.97835	2.75309	3.07682	2.76185	3.01515	3.01289	2.69104	2.56389	2.11784	2.16468
P2O5	0.759726	0.751679	0.778131	0.803133	0.678802	0.699816	0.692259	0.689071	0.707849	0.736388	0.680759	0.658663	0.750491	0.692619	0.796039	0.794682
LOl	4.37779	3.58892	3.56316	3.69711	2.3072	2.55455	2.55878	2.31765	4.12097	4.26714	4.64693	4.46848	4.38463	4.1862	4.5537	4.79953
Total	98.4035	97.8873	98.3598	98.4288	98.311	98.877	98.7532	98.335	98.1301	98.6323	98.1471	98.7581	98.6505	98.6055	98.1806	98.3914
TFe2O3	10.9203	10.9207	11.3768	11.432	10.2844	10.446	10.2384	10.1152	9.5191	9.41143	9.10878	8.74204	9.5268	9.51358	10.0964	10.1571
Mg#	44.7952	47.0852	45.9246	44.2107	57.1028	57.4546	59.3803	59.8662	50.8701	43.2038	50.608	48.0506	48.3751	48.3803	50.029	51.3875
Li	29.22	27.44	24.96	52.12	37.08	30.7	28.14	29.72	32.68	53.44	51.82	54.86	51.08	54.16	88.26	88.06
P	3934	4910	3856	3828	3484	3986	4022	3456	4126	3754	3950	3254	4390	3510	4788	4606
K	23440	26800	20500	24100	27380	32740	32420	25460	33920	27080	33060	29200	29800	24700	23580	24020
Sc	14.878	19.752	16.206	15.532	19.184	23.24	24.42	20.44	16.704	14.098	15.378	12.78	16.388	13.904	16.308	16.326
Ti	16606.8	21720	17188.2	16956	14220	17536	17998	14477.4	14360	12567.6	13334	10931.4	14718	11878.2	15344	15078
V	174.204	219.8	183.6	183.06	186.84	214.6	227.8	187.56	151.42	141.354	141.64	123.66	151.66	135.216	158.14	151.9
Cr	129.74	156.48	151.62	232.4	252	219.6	267	257.6	124.76	110	116.22	116.3	108.2	124.2	87.72	93.46
Mn	1396.8	1310	1332.4	1234.6	1463.6	1514.4	1502	1407.8	1706.2	1711.2	1566.4	1603.8	1639.6	1608.2	1988	1991.4
Co	37	42.02	40.04	39.3	41.38	41.22	43.26	42.72	31.38	27.72	28.84	28.08	29.44	31.38	30.04	31.12
Ni	58.64	75.78	75.96	68.8	141.46	116.58	150.96	156.6	63.64	42.78	59.46	56.88	49.72	64.4	45.36	51.7
Cu	41.08	45.32	43.28	48.1	54.38	43.06	40.46	43.54	31.18	31.82	29.42	29.52	31.6	29.94	34.46	27.72
Zn	101.74	104.96	106.84	110.82	105.08	88.28	84.78	91.62	95	106.62	90.14	100.26	97.56	102.08	116.54	111.6
Ga	22.34	23.8	22.42	22.36	21.78	21.32	20.78	20.36	22.48	24.06	22.44	22.52	22.62	23.08	23.08	22.44
Rb	35.9	30.74	30.26	36.84	47.38	45.38	46.6	45.4	47.4	55.5	49.52	53.24	46.56	50.34	42.64	41.38
Sr	879	1035	989	1023	1254.8	1186.6	1087.2	1080.4	1305.4	1429.8	1238.8	1332.4	1253.6	1276	1082.4	1079
Y	23.52	26.48	24.18	23.98	24.84	26.26	25.7	24.12	28.62	29.52	27.44	26.62	29.34	28.08	30.24	29.72
Zr	247.52	325.8	246.84	249.56	294.61	350.8	334	263.33	438	396.27	424.2	353.77	447	371.79	436.8	435.2
Nb	76.716	88	75.528	68.528	103.32	122.66	115.5	96.138	153.4	142.47	149.64	127.026	158.58	136.566	161.5	161.84
Cs	4.002	2.018	2.128	1.3904	2.478	2.576	2.698	2.76	4.606	5.03	4.634	4.806	4.546	4.896	3.994	3.426
Ba	489.2	509.6	502.8	506.4	564.2	529.4	524.4	543.2	538	766.8	809.4	796.4	812.8	797.4	985.4	976.6
La	34.36	39.48	35.08	34.08	43.72	44.94	42.46	40.84	65.98	63.9	58.46	59.62	67.42	60.44	69.72	67.4
Ce	74.18	87.56	75.1	73.22	85.34	93.26	88.82	78.96	118.68	119.04	114.72	108.16	123.08	111	127.8	122.18
Pr	8.434	9.326	8.644	8.358	9.224	9.55	9.158	8.638	11.786	12.522	11.332	11.318	12.118	11.708	12.632	12.396
Sm	6.868	7.708	7.078	6.872	6.96	7.27	7.068	6.664	8.11	8.48	7.708	7.574	8.342	7.954	8.776	8.552
Nd	33.9	38.1	34.92	33.74	35.6	37.52	36.24	33.78	44.38	46.34	42.46	41.6	45.5	43.28	47.9	46.94
Eu	2.188	2.408	2.274	2.182	2.188	2.242	2.16	2.082	2.448	2.614	2.39	2.432	2.516	2.472	2.654	2.624
Gd	6.48	7.15	6.668	6.44	6.51	6.706	6.57	6.228	7.23	7.644	6.862	6.8	7.446	7.142	7.744	7.584
Tb	0.8496	0.9394	0.8764	0.8478	0.858	0.8918	0.8744	0.829	0.9562	1.0032	0.9086	0.8978	0.9786	0.9442	1.0136	0.9952
Dy	4.868	5.292	5.036	4.882	5.004	5.094	5	4.842	5.454	5.864	5.18	5.258	5.56	5.508	5.742	5.636
Ho	0.9044	0.9324	0.9258	0.901	0.9384	0.9108	0.893	0.9054	0.982	1.1088	0.9322	0.9954	0.9998	1.0404	1.032	1.0134
Er	2.272	2.522	2.328	2.264	2.446	2.544	2.472	2.348	2.782	2.912	2.636	2.62	2.826	2.728	2.892	2.836
Tm	0.3126	0.3274	0.318	0.315	0.3442	0.3348	0.3258	0.3328	0.3756	0.4212	0.3596	0.3822	0.3794	0.396	0.3896	0.3794
Yb	1.8902	2.004	1.9308	1.8726	2.104	2.114	2.068	2.036	2.402	2.656	2.29	2.396	2.448	2.504	2.482	2.44
Lu	0.2742	0.2866	0.2788	0.2728	0.3154	0.308	0.3006	0.3044	0.3552	0.3978	0.3344	0.3558	0.3584	0.3722	0.3612	0.3544
Hf	6.201	5.448	5.9875	6.0788	7.007	5.6928	5.4	6.3648	6.8328	9.1208	6.5136	8.1146	6.936	8.6086	6.756	6.6624
Ta	4.438	5.7624	4.404	4.325	6.219	7.416	7.0272	5.719	9.51	8.838	9.1968	7.884	9.8064	10.3	9.8124	9.78
Pb	3.202	3.088	2.958	7.818	3.488	3.422	3.356	3.306	4.284	4.874	4.296	4.816	4.43	4.658	7.374	6.898
Th	3.982	4.158	4.048	3.996	6.342	6.124	5.804	5.784	8.31	9.736	8.084	8.674	8.46	9.002	8.324	8.23
U	1.3372	1.263	1.3454	1.5564	2.014	1.754	1.6346	1.8258	2.386	2.988	2.214	2.668	2.382	2.786	2.298	2.316

## Sheet: Table S9
Table S9. Sr-Nd isotopic compositions of the Tuoyun monchiquite Ⅰ, Ⅱ and camptonite
Sample	Rock	Rb(ppm)	Sr(ppm)	87Rb/86Sr	87Sr/86Sr	(87Sr/86Sr)t	Sm(ppm)	Nd(ppm)	147Sm/144Nd	143Nd/144Nd	(143Nd/144Nd)t	εNd(t)	T	TDM (Ga)
TY-04-01	camptonite	35.9	879	0.12175	0.704848	0.704015	6.868	33.9	0.122488	0.512872	0.512834	5.0197	48	0.465989
TY-05-02	camptonite	30.74	1035	0.0885371	0.705174	0.704568	7.708	38.1	0.122315	0.512861	0.512823	4.80752	48	0.483363
TY-05-03	camptonite	30.26	989	0.0912084	0.705256	0.704632	7.078	34.92	0.122545	0.512856	0.512818	4.71305	48	0.492574
TY-05-05	camptonite	36.84	1023	0.107351	0.704646	0.703912	6.872	33.74	0.12314	0.512858	0.512819	4.73555	48	0.493549
TY-02-01	monchiquite Ⅰ	47.38	1254.8	0.11256	0.70496	0.70419	6.96	35.6	0.118203	0.512924	0.512887	6.06746	48	0.361351
TY-02-02	monchiquite Ⅰ	45.38	1186.6	0.114005	0.704676	0.703896	7.27	37.52	0.117149	0.512908	0.512871	5.75534	48	0.383239
TY-04-02	monchiquite Ⅰ	46.6	1087.2	0.127773	0.705399	0.704525	7.068	36.24	0.117917	0.512934	0.512897	6.26646	48	0.344149
TY-04-03	monchiquite Ⅰ	45.4	1080.4	0.125266	0.70505	0.704193	6.664	33.78	0.119273	0.512907	0.512869	5.71402	48	0.394207
TY-03-04	monchiquite Ⅱ	47.4	1305.4	0.108242	0.704965	0.704224	8.11	44.38	0.110484	0.512891	0.512856	5.46001	48	0.383985
TY-04-05	monchiquite Ⅱ	55.5	1429.8	0.115712	0.706281	0.70549	8.48	46.34	0.110639	0.512943	0.512909	6.48683	48	0.306483
TY-04-06	monchiquite Ⅱ	49.52	1238.8	0.119163	0.706252	0.705437	7.708	42.46	0.109756	0.51293	0.512895	6.22729	48	0.32384
TY-04-09	monchiquite Ⅱ	53.24	1332.4	0.119115	0.706219	0.705405	7.574	41.6	0.110078	0.512922	0.512887	6.06808	48	0.336727
TY-04-11	monchiquite Ⅱ	46.56	1253.6	0.110717	0.706301	0.705544	8.342	45.5	0.110848	0.512923	0.512888	6.07799	48	0.338134
TY-04-13	monchiquite Ⅱ	50.34	1276	0.117605	0.706171	0.705367	7.954	43.28	0.111113	0.512931	0.512896	6.23615	48	0.326815
TY-04-19	monchiquite Ⅱ	42.64	1082.4	0.117433	0.706785	0.705982	8.776	47.9	0.110772	0.512924	0.51289	6.11572	48	0.33505
TY-04-22	monchiquite Ⅱ	41.38	1079	0.110945	0.706621	0.706545	8.552	46.94	0.110155	0.512927	0.512892	6.16029	48	0.329961

## Sheet: Table S10
Table S10. Olivine SIMS in situ oxygen isotopic compositions (‰) of the monchiquite Ⅰ
Sample	δ O18SMOW (‰)	2SE	Fo	CaO (wt.%)
Olivine phenocrysts in monchiquite Ⅰ
TY-07-02@3	4.94981	0.0733664	77.0038	0.163
TY-07-02@5	5.26047	0.0554576	80.1989	0.153
TY-07-02@7	5.27529	0.0739109	78.2083	0.054
TY-07-02@8	5.36713	0.0782293	78.1236	0.072
TY-07-02@9	5.40071	0.0732176	77.917	0.051
TY-07-02@10	5.27331	0.0802511	80.353	0.179
TY-07-02@11	5.10392	0.0783982	78.8659	0.168
TY-07-02@12	5.36861	0.066665	77.4073	0.181
TY-07-02@13	5.09651	0.0737927	78.3766	0.064
TY-07-02@14	5.17454	0.068551	78.2573	0.067
TY-07-02@15	5.06095	0.0870068	79.4128	0.183
TY-07-02@16	5.09947	0.0730547	79.2656	0.169
TY-07-02@17	5.37553	0.0681098	80.485	0.18
TY-07-02@18	5.37059	0.0657721	76.4787	0.161
TY-07-02@19	5.0812	0.0721321	79.4538	0.176
TY-07-02@20	4.85052	0.0707727	77.3417	0.173
TY-07-02@21	5.36861	0.0991695	89.6913	0.064
TY-07-02@22	4.81297	0.0658498	73.8912	0.157
TY07-03@01	4.92162	0.070613	76.1483	0.16
TY07-03@05	4.97249	0.0719833	75.8972	0.148
Mantle olivine xenocrysts
TY02-01@01	5.36611	0.070613	90.4208	0.061
TY02-01@2	5.14367	0.0719833	88.5723	0.07
TY02-01@5	5.34317	0.070613	89.7509	0.062
TY-02-04@2	5.21603	0.0811006	90.0378	0.06
TY-02-04@5	5.12071	0.0802302	86.7693	0.074
TY-02-04@9	5.1375	0.070613	88.3321	0.06
TY-02-04@10	5.13158	0.0719833	88.8769	0.081
TY-02-04@13	5.32022	0.071425	87.2881	0.073
TY-02-04@17	5.178	0.0794527	89.8094	0.077
TY-02-04@21	4.97451	0.0777476	90.2913	0.065
